# Supplementary material for: 5-HT2A Receptor Knockout Mice Show Sex-Dependent Differences following Acute Noribogaine Administration
Source: MDPI journal article supplement (doi:10.3390/ijms25020687), 2024-01-05
Supplement: s1 [file s1]

## Supplementary Information

### Supplementary Figure S1: Patch clamp recordings during paired-pulse stimulation. AMPA and NMDA-mediated components of evoked postsynaptic currents (EPSCs)

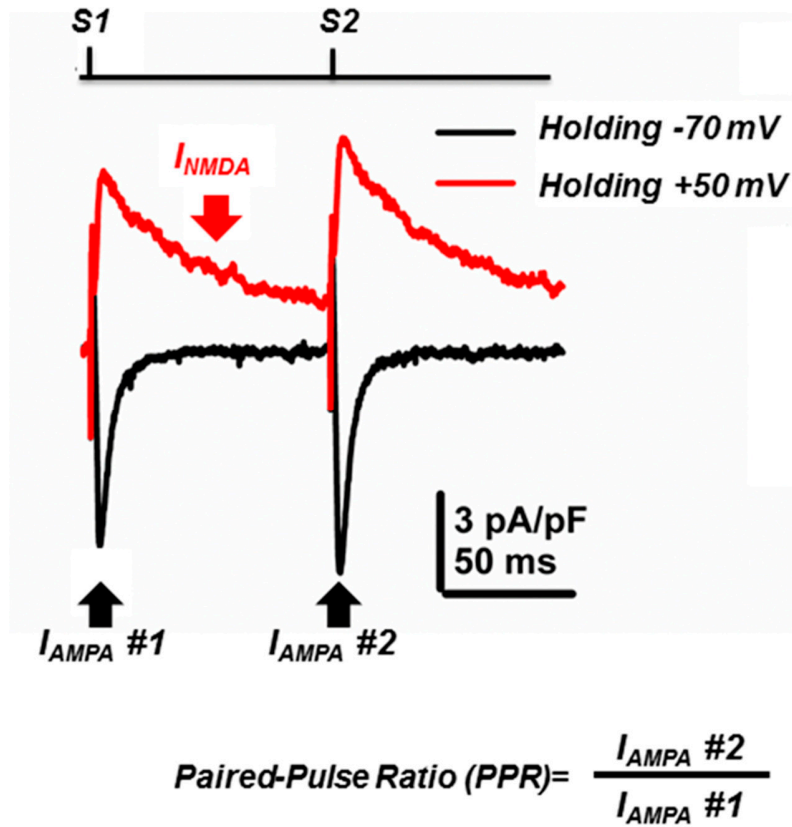

**Figure S1:** Representative paired-pulse (See above, S1 & S2 stimuli, separated 100 ms) evoked excitatory postsynaptic currents (EPSC) obtained using whole-cell patch-clamp recordings were performed in medial prefrontal coronal slices in an extracellular ACSF solution containing MgCl<sub>2</sub> (1 mM), CaCl<sub>2</sub> (1 mM) and bicuculline (5- 10 μM), as previously described (ref, #40). Paired pulse ratio (PPR) shown in figures 4 and 5 were calculated as the fraction of 2nd AMPA-mediated EPSC ( $I_{\text{AMPA \#2}}$ )/1st ( $I_{\text{AMPA \#1}}$ ) peak amplitudes (black arrowheads) while pyramidal cells were held at -70 mV holding (black trace). NMDA-mediated current density was measured 50 ms after first stimulus artifact at +50 mV holding, a fraction of currents that was blocked in the presence of AP5 (50 μM), as previously described (ref. #41).

### Supplementary Figures S2 & S3: Noribogaine characterization



ppm downfield from TMS (0.000 ppm) as an internal reference, and carbon chemical shifts are reported in ppm relative to the center line of the  $\text{CDCl}_3$  triplet (77.0 ppm).

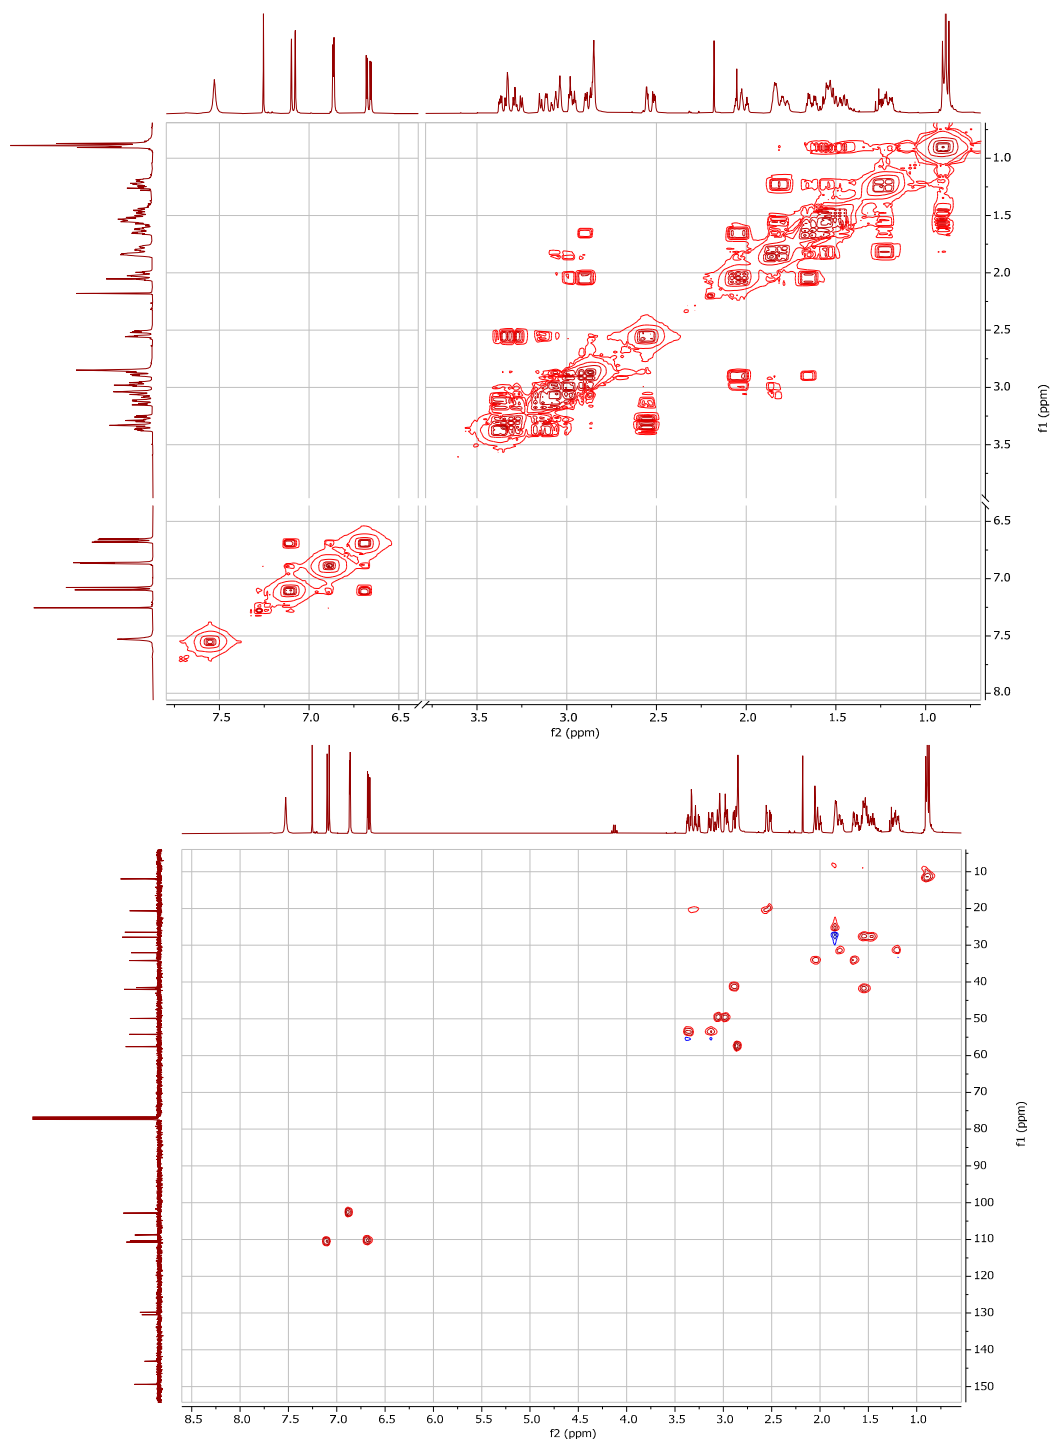

**Figure S3: Bidimensional spectra used for characterization and H and C assignment of noribogaine.** COSY and HSQC used for the elucidation of the chemical structure of noribogaine are provided.

**Supplementary Information of primers' sequences used for genotyping**

**2A PCR Geno upper CTG TGG GAT TTT CTT TCT GCT**

**2A PCR Geno lower GTG TGA TGG CTC TTG ATT ATG C**

**2A PCR Geno tta lower TGG GCG AGT TTA CGG GTT GTT A**
